# Supplementary material
Source: publisher site journal article supplement (https://www.degruyterbrill.com/publication/isbn/9783110256659/downloadAsset/9783110256659_Inhaltsverzeichnis.pdf)
Supplement: Supplementary file 1 [file 9783110256659_Inhaltsverzeichnis.pdf]

# Inhaltsverzeichnis

|         |                                                        |    |
|---------|--------------------------------------------------------|----|
| 1       | Grundsätze und Grundbegriffe . . . . .                 | 1  |
| 1.1     | Gegenstand, Zielsetzung und Darstellungsprinzipien . . | 1  |
| 1.1.1   | Das Wesen der Wortbildung . . . . .                    | 1  |
| 1.1.2   | Gegenstand der Darstellung . . . . .                   | 3  |
| 1.1.3   | Synchronie und Diachronie . . . . .                    | 4  |
| 1.1.4   | Beschreibungsprinzipien und -ziele . . . . .           | 5  |
| 1.1.5   | Darstellungs- und Formulierungskonventionen . . . .    | 8  |
| 1.2     | Wortbildung und andere Bereiche der Grammatik . . .    | 9  |
| 1.2.1   | Wortbildung und Flexionsmorphologie . . . . .          | 9  |
| 1.2.2   | Wortbildung und Syntax . . . . .                       | 12 |
| 1.2.3   | Wortbildung und Phonologie . . . . .                   | 15 |
| 1.2.4   | Wortbildung und Orthografie . . . . .                  | 16 |
| 1.3     | Wortbildung und Lexikon . . . . .                      | 17 |
| 1.3.1   | Wortbildung und Wortschöpfung . . . . .                | 18 |
| 1.3.2   | Wortbildung und Entlehnung . . . . .                   | 20 |
| 1.3.3   | Wortbildung und Bedeutungsbildung . . . . .            | 21 |
| 1.3.4   | Wortbildung und Phraseologisierung . . . . .           | 22 |
| 1.3.5   | Lexikalisierung . . . . .                              | 23 |
| 1.4     | Wortbildung und Text . . . . .                         | 26 |
| 1.4.1   | Textkonstitutive Funktion . . . . .                    | 27 |
| 1.4.2   | Textdistinktive Funktion . . . . .                     | 30 |
| 1.4.2.1 | Stilbildende Potenzen der Wortbildung . . . . .        | 31 |
| 1.4.2.2 | Textsortentypische Wortbildung . . . . .               | 34 |

## **X Inhaltsverzeichnis**

|         |                                                        |    |
|---------|--------------------------------------------------------|----|
| 1.5     | Motivation . . . . .                                   | 42 |
| 1.5.1   | Grundsätzliches . . . . .                              | 42 |
| 1.5.2   | Phonetisch-phonemische Motivation . . . . .            | 42 |
| 1.5.3   | Figurative Motivation . . . . .                        | 43 |
| 1.5.4   | Morphosemantische Motivation . . . . .                 | 44 |
| 1.5.4.1 | Abstufung der Motivation . . . . .                     | 44 |
| 1.5.4.2 | Wortbildungsbedeutung . . . . .                        | 47 |
| 1.5.4.3 | Motivation und Polysemie . . . . .                     | 48 |
| 1.5.4.4 | Motivation in der Kommunikation . . . . .              | 49 |
| 1.6     | Einheiten der Wortbildung . . . . .                    | 51 |
| 1.6.1   | Wörter . . . . .                                       | 51 |
| 1.6.2   | Affixe . . . . .                                       | 52 |
| 1.6.2.1 | Grundsätzliches . . . . .                              | 52 |
| 1.6.2.2 | Affixarten . . . . .                                   | 54 |
| 1.6.2.3 | Affixbestand . . . . .                                 | 56 |
| 1.6.2.4 | Erweiterung des Affixbestandes . . . . .               | 58 |
| 1.6.3   | Konfixe . . . . .                                      | 63 |
| 1.6.4   | Syntagmen und Sätze . . . . .                          | 65 |
| 1.6.5   | Unikale Morpheme . . . . .                             | 65 |
| 1.6.6   | Fugenelemente . . . . .                                | 66 |
| 1.7     | Modellierung . . . . .                                 | 67 |
| 1.7.1   | Ziel der Modellierung . . . . .                        | 67 |
| 1.7.1.1 | Strukturelle und morphologische Modellierung . . . . . | 69 |
| 1.7.1.2 | Semantische Modellierung . . . . .                     | 71 |
| 1.7.1.3 | Modellierungsschritte . . . . .                        | 73 |
| 1.7.2   | Produktivität und Akzeptabilität . . . . .             | 74 |
| 1.7.2.1 | Produktivität . . . . .                                | 74 |
| 1.7.2.2 | Bildungsrestriktionen . . . . .                        | 77 |
| 1.7.2.3 | Blockierung . . . . .                                  | 79 |
| 1.7.2.4 | Akzeptabilität . . . . .                               | 80 |
| 1.7.3   | Aktivität . . . . .                                    | 81 |
| 1.8     | Klassifizierung . . . . .                              | 82 |
| 1.8.1   | Wortbildungsarten . . . . .                            | 83 |

|         |                                                   |     |
|---------|---------------------------------------------------|-----|
| 1.8.1.1 | Komposition . . . . .                             | 84  |
| 1.8.1.2 | Derivation . . . . .                              | 86  |
| 1.8.1.3 | Konversion . . . . .                              | 87  |
| 1.8.1.4 | Kurzwortbildung . . . . .                         | 91  |
| 1.8.1.5 | Partikelverbbildung . . . . .                     | 91  |
| 1.8.1.6 | Rückbildung . . . . .                             | 92  |
| 1.8.1.7 | Kontamination . . . . .                           | 93  |
| 1.8.1.8 | Reduplikation . . . . .                           | 94  |
| 1.8.2   | Wortbildungsparadigmen . . . . .                  | 96  |
| 1.8.2.1 | Funktional-semantische Klassen . . . . .          | 96  |
| 1.8.2.2 | Wortbildungsreihen . . . . .                      | 98  |
| 1.8.2.3 | Wortfamilien . . . . .                            | 99  |
| 1.8.2.4 | Wortbildungssynonymie und -antonymie . . . . .    | 100 |
| 1.9     | Zur Spezifik der Fremdwortbildung . . . . .       | 101 |
| 1.9.1   | Gegenstand . . . . .                              | 102 |
| 1.9.2   | Probleme der Analyse und Klassifikation . . . . . | 104 |
| 1.9.2.1 | Grundsätzliches . . . . .                         | 104 |
| 1.9.2.2 | Einheiten der Fremdwortbildung . . . . .          | 105 |
| 1.9.2.3 | Fugenelemente . . . . .                           | 110 |
| 1.9.3   | Wortbildungsarten . . . . .                       | 111 |
| 1.9.3.1 | Komposition . . . . .                             | 111 |
| 1.9.3.2 | Derivation . . . . .                              | 112 |
| 2       | Wortbildung des Substantivs . . . . .             | 117 |
| 2.1     | Allgemeine Charakteristik . . . . .               | 117 |
| 2.1.1   | Produktivität . . . . .                           | 117 |
| 2.1.2   | Aktivität . . . . .                               | 118 |
| 2.1.3   | Funktional-semantische Klassen . . . . .          | 119 |
| 2.1.3.1 | Modifikationsarten . . . . .                      | 119 |
| 2.1.3.2 | Transpositionsarten . . . . .                     | 121 |
| 2.2     | Komposition . . . . .                             | 127 |
| 2.2.1   | Grundsätzliches . . . . .                         | 127 |
| 2.2.1.1 | Stabilität der Wortstruktur . . . . .             | 127 |

## **XII** Inhaltsverzeichnis

|          |                                                                              |     |
|----------|------------------------------------------------------------------------------|-----|
| 2.2.1.2  | Lockerung der Stabilität . . . . .                                           | 128 |
| 2.2.1.3  | Semantische Eigenschaften . . . . .                                          | 129 |
| 2.2.1.4  | Kompositum und Syntagma . . . . .                                            | 131 |
| 2.2.1.5  | Zur Kompositionsaktivität . . . . .                                          | 133 |
| 2.2.2    | Substantiv als Erstglied . . . . .                                           | 136 |
| 2.2.2.1  | Formativstrukturen des Determinativkompositums . . .                         | 136 |
| 2.2.2.2  | Polymorphemisches Kompositum . . . . .                                       | 138 |
| 2.2.2.3  | Zur Semantik . . . . .                                                       | 139 |
| 2.2.2.4  | Semantisch bedingte Bildungsrestriktionen . . . . .                          | 148 |
| 2.2.2.5  | Kopulativkompositum . . . . .                                                | 149 |
| 2.2.2.6  | Übergangsbereich zwischen Determinativ- und<br>Kopulativkompositum . . . . . | 151 |
| 2.2.3    | Adjektiv als Erstglied . . . . .                                             | 152 |
| 2.2.3.1  | Formativstrukturen . . . . .                                                 | 152 |
| 2.2.3.2  | Zur Semantik . . . . .                                                       | 156 |
| 2.2.4    | Verbstamm als Erstglied . . . . .                                            | 159 |
| 2.2.4.1  | Grundsätzliches . . . . .                                                    | 159 |
| 2.2.4.2  | Formativstrukturen . . . . .                                                 | 161 |
| 2.2.4.3  | Zur Semantik . . . . .                                                       | 162 |
| 2.2.5    | Pronomen als Erstglied . . . . .                                             | 164 |
| 2.2.6    | Numerale als Erstglied . . . . .                                             | 166 |
| 2.2.7    | Flexionsloses Wort als Erstglied . . . . .                                   | 166 |
| 2.2.7.1  | Grundsätzliches . . . . .                                                    | 166 |
| 2.2.7.2  | Präposition als Erstglied . . . . .                                          | 167 |
| 2.2.7.3  | Adverb als Erstglied . . . . .                                               | 170 |
| 2.2.8    | Konfix als Erstglied . . . . .                                               | 172 |
| 2.2.9    | Syntagma und Satz als Erstglied . . . . .                                    | 174 |
| 2.2.9.1  | Substantivisches Syntagma . . . . .                                          | 175 |
| 2.2.9.2  | Verbales Syntagma . . . . .                                                  | 176 |
| 2.2.9.3  | Sonstige Syntagmen . . . . .                                                 | 177 |
| 2.2.9.4  | Sätze . . . . .                                                              | 177 |
| 2.2.10   | Possessivkompositum . . . . .                                                | 178 |
| 2.2.11   | Onymische und deonymische Komposition . . . . .                              | 179 |
| 2.2.11.1 | Grundsätzliches . . . . .                                                    | 179 |
| 2.2.11.2 | Onymische Kompositionsmodelle . . . . .                                      | 180 |
| 2.2.11.3 | Onymische Komposita mit appellativischen Elementen .                         | 181 |
| 2.2.11.4 | Deonymische Komposita . . . . .                                              | 183 |

|          |                                                |     |
|----------|------------------------------------------------|-----|
| 2.2.12   | Form der Kompositionsfuge . . . . .            | 185 |
| 2.2.12.1 | Grundsätzliches . . . . .                      | 185 |
| 2.2.12.2 | Substantivisches Erstglied . . . . .           | 186 |
| 2.2.12.3 | Verbales Erstglied . . . . .                   | 190 |
| 2.2.12.4 | Schwankungen bei der Fugengestaltung . . . . . | 191 |
| 2.2.12.5 | Grafische Besonderheiten . . . . .             | 192 |
| 2.3      | Suffixderivation . . . . .                     | 195 |
| 2.3.1    | Grundsätzliches . . . . .                      | 195 |
| 2.3.2    | Indigene Suffixe . . . . .                     | 195 |
| 2.3.2.1  | Suffix <i>-e</i> . . . . .                     | 195 |
| 2.3.2.2  | Suffix <i>-ei/-erei</i> . . . . .              | 198 |
| 2.3.2.3  | Suffix <i>-el</i> . . . . .                    | 200 |
| 2.3.2.4  | Suffix <i>-er</i> . . . . .                    | 201 |
| 2.3.2.5  | Suffix <i>-ler</i> . . . . .                   | 207 |
| 2.3.2.6  | Suffix <i>-ner</i> . . . . .                   | 208 |
| 2.3.2.7  | Suffix <i>-heit/-keit/-igkeit</i> . . . . .    | 209 |
| 2.3.2.8  | Suffix <i>-i</i> . . . . .                     | 214 |
| 2.3.2.9  | Suffix <i>-icht</i> . . . . .                  | 215 |
| 2.3.2.10 | Suffix <i>-ling</i> . . . . .                  | 216 |
| 2.3.2.11 | Suffix <i>-nis</i> . . . . .                   | 218 |
| 2.3.2.12 | Suffix <i>-s</i> . . . . .                     | 220 |
| 2.3.2.13 | Suffix <i>-sal</i> . . . . .                   | 221 |
| 2.3.2.14 | Suffix <i>-schaft</i> . . . . .                | 221 |
| 2.3.2.15 | Suffix <i>-sel</i> . . . . .                   | 223 |
| 2.3.2.16 | Suffix <i>-tel</i> . . . . .                   | 223 |
| 2.3.2.17 | Suffix <i>-tum</i> . . . . .                   | 223 |
| 2.3.2.18 | Suffix <i>-ung</i> . . . . .                   | 225 |
| 2.3.2.19 | Suffix <i>-werk</i> . . . . .                  | 230 |
| 2.3.2.20 | Suffix <i>-wesen</i> . . . . .                 | 231 |
| 2.3.2.21 | Diminutivsuffixe . . . . .                     | 231 |
| 2.3.2.22 | Movierung . . . . .                            | 236 |
| 2.3.3    | Exogene Suffixe . . . . .                      | 239 |
| 2.3.3.1  | Feminina . . . . .                             | 240 |
| 2.3.3.2  | Maskulina . . . . .                            | 244 |
| 2.3.3.3  | Maskulina und Neutra . . . . .                 | 247 |
| 2.3.3.4  | Feminina und Neutra . . . . .                  | 247 |
| 2.3.3.5  | Neutra . . . . .                               | 248 |

## **XIV** Inhaltsverzeichnis

|         |                                                              |     |
|---------|--------------------------------------------------------------|-----|
| 2.3.4   | Onymische und deonymische Suffixe . . . . .                  | 250 |
| 2.3.4.1 | Onymische Suffixe von Personennamen . . . . .                | 250 |
| 2.3.4.2 | Onymische Suffixe von Ortsnamen . . . . .                    | 251 |
| 2.3.4.3 | Onymische Suffixe von Länder- und Landschaftsnamen . . . . . | 252 |
| 2.3.4.4 | Deonymische Suffixe . . . . .                                | 253 |
| 2.3.5   | Unproduktive Suffixe . . . . .                               | 254 |
| 2.4     | Präfixderivation . . . . .                                   | 255 |
| 2.4.1   | Grundsätzliches . . . . .                                    | 255 |
| 2.4.2   | Indigene Präfixe . . . . .                                   | 255 |
| 2.4.2.1 | Präfix <i>erz-</i> . . . . .                                 | 255 |
| 2.4.2.2 | Präfix <i>ge-</i> . . . . .                                  | 256 |
| 2.4.2.3 | Präfix <i>haupt-</i> . . . . .                               | 257 |
| 2.4.2.4 | Präfix <i>miss-</i> . . . . .                                | 258 |
| 2.4.2.5 | Präfix <i>un-</i> . . . . .                                  | 259 |
| 2.4.2.6 | Präfix <i>ur-</i> . . . . .                                  | 260 |
| 2.4.3   | Exogene Präfixe . . . . .                                    | 262 |
| 2.4.3.1 | Negation und Augmentation . . . . .                          | 262 |
| 2.4.3.2 | Sonstige Präfixe . . . . .                                   | 263 |
| 2.4.4   | Unproduktive Präfixe . . . . .                               | 265 |
| 2.5     | Zirkumfixderivation . . . . .                                | 266 |
| 2.6     | Konversion . . . . .                                         | 267 |
| 2.6.1   | Morphologische Konversion . . . . .                          | 267 |
| 2.6.1.1 | Verbale Basen . . . . .                                      | 267 |
| 2.6.1.2 | Sonstige Basen . . . . .                                     | 269 |
| 2.6.2   | Syntaktische Konversion . . . . .                            | 270 |
| 2.6.2.1 | Verbale Basen . . . . .                                      | 270 |
| 2.6.2.2 | Adjektivische und partizipiale Basen . . . . .               | 272 |
| 2.6.2.3 | Phrasale Basen . . . . .                                     | 274 |
| 2.7     | Kurzwortbildung . . . . .                                    | 277 |
| 2.7.1   | Kurzworttypen . . . . .                                      | 277 |
| 2.7.2   | Wortstatus . . . . .                                         | 280 |
| 2.7.3   | Wortbildung mit Kurzwörtern . . . . .                        | 283 |

|         |                                                       |     |
|---------|-------------------------------------------------------|-----|
| 2.7.4   | Wortschatzerweiterung . . . . .                       | 284 |
| 2.7.4.1 | Kurzwort-Neubildungen . . . . .                       | 285 |
| 2.7.4.2 | Inventarisierung . . . . .                            | 286 |
| 2.7.5   | Kurzwortbildung im Text . . . . .                     | 287 |
| 2.7.5.1 | Textkonstitutive Funktion . . . . .                   | 288 |
| 2.7.5.2 | Stilbildende Potenzen . . . . .                       | 289 |
| 2.7.5.3 | Textsortentypische Kurzwortbildung . . . . .          | 290 |
| 3       | Wortbildung des Adjektivs . . . . .                   | 297 |
| 3.1     | Allgemeine Charakteristik . . . . .                   | 297 |
| 3.1.1   | Produktivität . . . . .                               | 297 |
| 3.1.2   | Aktivität . . . . .                                   | 299 |
| 3.1.3   | Reihenbildung kompositioneller Zweitglieder . . . . . | 300 |
| 3.1.4   | Funktional-semantische Klassen . . . . .              | 305 |
| 3.1.4.1 | Modifikationsarten . . . . .                          | 305 |
| 3.1.4.2 | Transpositionsarten . . . . .                         | 306 |
| 3.1.5   | Gradation . . . . .                                   | 310 |
| 3.1.6   | Vergleichsbildungen . . . . .                         | 314 |
| 3.1.7   | Deonymische Adjektivbildungen . . . . .               | 316 |
| 3.1.7.1 | Onymische Erstglieder . . . . .                       | 316 |
| 3.1.7.2 | Deonymische Derivation . . . . .                      | 317 |
| 3.1.7.3 | Deonymische Konversion . . . . .                      | 319 |
| 3.2     | Komposition . . . . .                                 | 320 |
| 3.2.1   | Grundsätzliches . . . . .                             | 320 |
| 3.2.2   | Substantiv als Erstglied . . . . .                    | 322 |
| 3.2.2.1 | Formativstrukturen . . . . .                          | 322 |
| 3.2.2.2 | Zur Semantik . . . . .                                | 323 |
| 3.2.3   | Adjektiv als Erstglied . . . . .                      | 325 |
| 3.2.3.1 | Determinativkompositum . . . . .                      | 325 |
| 3.2.3.2 | Kopulativkompositum . . . . .                         | 326 |
| 3.2.4   | Verbstamm als Erstglied . . . . .                     | 328 |
| 3.2.5   | Sonstige Erstglieder . . . . .                        | 328 |
| 3.2.6   | Form der Kompositionsfrage . . . . .                  | 330 |

## XVI Inhaltsverzeichnis

|          |                                     |     |
|----------|-------------------------------------|-----|
| 3.3      | Suffixderivation . . . . .          | 332 |
| 3.3.1    | Grundsätzliches . . . . .           | 332 |
| 3.3.2    | Indigene Suffixe . . . . .          | 332 |
| 3.3.2.1  | Suffix <i>-bar</i> . . . . .        | 332 |
| 3.3.2.2  | Suffix <i>-en/-ern/-n</i> . . . . . | 335 |
| 3.3.2.3  | Suffix <i>-er</i> . . . . .         | 336 |
| 3.3.2.4  | Suffix <i>-fach</i> . . . . .       | 336 |
| 3.3.2.5  | Suffix <i>-haft</i> . . . . .       | 336 |
| 3.3.2.6  | Suffix <i>-ig</i> . . . . .         | 337 |
| 3.3.2.7  | Suffix <i>-isch</i> . . . . .       | 339 |
| 3.3.2.8  | Suffix <i>-lich</i> . . . . .       | 342 |
| 3.3.2.9  | Suffix <i>-los</i> . . . . .        | 345 |
| 3.3.2.10 | Suffix <i>-mäßig</i> . . . . .      | 346 |
| 3.3.2.11 | Suffix <i>-sam</i> . . . . .        | 348 |
| 3.3.3    | Exogene Suffixe . . . . .           | 348 |
| 3.4      | Präfixderivation . . . . .          | 351 |
| 3.4.1    | Grundsätzliches . . . . .           | 351 |
| 3.4.2    | Indigene Präfixe . . . . .          | 352 |
| 3.4.2.1  | Präfix <i>erz-</i> . . . . .        | 352 |
| 3.4.2.2  | Präfix <i>miss-</i> . . . . .       | 352 |
| 3.4.2.3  | Präfix <i>un-</i> . . . . .         | 352 |
| 3.4.2.4  | Präfix <i>ur-</i> . . . . .         | 354 |
| 3.4.3    | Exogene Präfixe . . . . .           | 355 |
| 3.4.3.1  | Negation . . . . .                  | 355 |
| 3.4.3.2  | Sonstige exogene Präfixe . . . . .  | 355 |
| 3.4.4    | Unproduktive Präfixe . . . . .      | 356 |
| 3.5      | Zirkumfixderivation . . . . .       | 357 |
| 3.6      | Konversion . . . . .                | 358 |
| 3.6.1    | Morphologische Konversion . . . . . | 358 |
| 3.6.2    | Syntaktische Konversion . . . . .   | 359 |
| 3.6.2.1  | Infinitivstammkonversion . . . . .  | 359 |
| 3.6.2.2  | Departizipiale Konversion . . . . . | 359 |



|          |                                                   |     |
|----------|---------------------------------------------------|-----|
| 4        | Wortbildung des Adverbs . . . . .                 | 360 |
| 4.1      | Allgemeine Charakteristik . . . . .               | 360 |
| 4.1.1    | Produktivität . . . . .                           | 361 |
| 4.1.2    | Aktivität . . . . .                               | 361 |
| 4.2      | Komposition . . . . .                             | 362 |
| 4.2.1    | Grundsätzliches . . . . .                         | 362 |
| 4.2.2    | Komposita mit <i>her</i> und <i>hin</i> . . . . . | 363 |
| 4.2.3    | Komposita mit Präpositionen . . . . .             | 364 |
| 4.2.4    | Sonstige Komposita . . . . .                      | 365 |
| 4.3      | Derivation . . . . .                              | 366 |
| 4.3.1    | Suffixderivation . . . . .                        | 366 |
| 4.3.1.1  | Grundsätzliches . . . . .                         | 366 |
| 4.3.1.2  | Suffix <i>-dings</i> . . . . .                    | 366 |
| 4.3.1.3  | Suffix <i>-ens</i> . . . . .                      | 367 |
| 4.3.1.4  | Suffix <i>-halben/-halber</i> . . . . .           | 367 |
| 4.3.1.5  | Suffix <i>-lei</i> . . . . .                      | 367 |
| 4.3.1.6  | Suffix <i>-lings</i> . . . . .                    | 368 |
| 4.3.1.7  | Suffix <i>-mals</i> . . . . .                     | 368 |
| 4.3.1.8  | Suffix <i>-maßen</i> . . . . .                    | 368 |
| 4.3.1.9  | Suffix <i>-s</i> . . . . .                        | 368 |
| 4.3.1.10 | Suffix <i>-wärts</i> . . . . .                    | 369 |
| 4.3.1.11 | Suffix <i>-weg</i> . . . . .                      | 369 |
| 4.3.1.12 | Suffix <i>-weise/-erweise</i> . . . . .           | 369 |
| 4.3.2    | Präfixderivation . . . . .                        | 370 |
| 4.4      | Konversion . . . . .                              | 370 |
| 4.4.1    | Konversion substantivischer Syntagmen . . . . .   | 371 |
| 4.4.2    | Konversion sonstiger Syntagmen . . . . .          | 371 |

- 5 Wortbildung des Verbs . . . . . 373
  - 5.1 Allgemeine Charakteristik . . . . . 373
    - 5.1.1 Wortbildungsarten . . . . . 373
    - 5.1.2 Affixbestand . . . . . 376
    - 5.1.3 Semantische und syntaktische Modifikation . . . . . 378
    - 5.1.4 Komplexes Verb und Syntagma . . . . . 379
  - 5.2 Präfixderivation . . . . . 380
    - 5.2.1 Grundsätzliches . . . . . 380
    - 5.2.2 Präfixe ohne homonyme Verbpartikel . . . . . 383
      - 5.2.2.1 Präfix *be-* . . . . . 383
      - 5.2.2.2 Präfix *ent-* . . . . . 385
      - 5.2.2.3 Präfix *er-* . . . . . 386
      - 5.2.2.4 Präfix *miss-* . . . . . 388
      - 5.2.2.5 Präfix *ver-* . . . . . 389
      - 5.2.2.6 Präfix *zer-* . . . . . 391
    - 5.2.3 Präfixe mit homonymer Verbpartikel . . . . . 392
      - 5.2.3.1 Grundsätzliches . . . . . 392
      - 5.2.3.2 Präfix *durch-* . . . . . 393
      - 5.2.3.3 Präfix *hinter-* . . . . . 393
      - 5.2.3.4 Präfix *über-* . . . . . 393
      - 5.2.3.5 Präfix *um-* . . . . . 394
      - 5.2.3.6 Präfix *unter-* . . . . . 394
      - 5.2.3.7 Präfix *wider-* . . . . . 395
    - 5.2.4 Exogene Präfixe . . . . . 395
  - 5.3 Partikelverbbildung . . . . . 396
    - 5.3.1 Präpositionale Verbpartikeln . . . . . 396
      - 5.3.1.1 Grundsätzliches . . . . . 396
      - 5.3.1.2 Verbpartikel *ab-* . . . . . 399
      - 5.3.1.3 Verbpartikel *an-* . . . . . 402
      - 5.3.1.4 Verbpartikel *auf-* . . . . . 404
      - 5.3.1.5 Verbpartikel *aus-* . . . . . 406
      - 5.3.1.6 Verbpartikel *bei-* . . . . . 408
      - 5.3.1.7 Verbpartikel *durch-* . . . . . 409
      - 5.3.1.8 Verbpartikel *ein-* . . . . . 410

|          |                                                          |     |
|----------|----------------------------------------------------------|-----|
| 5.3.1.9  | Verbpartikel <i>gegen-</i> . . . . .                     | 412 |
| 5.3.1.10 | Verbpartikel <i>hinter-</i> . . . . .                    | 412 |
| 5.3.1.11 | Verbpartikel <i>nach-</i> . . . . .                      | 413 |
| 5.3.1.12 | Verbpartikel <i>über-</i> . . . . .                      | 413 |
| 5.3.1.13 | Verbpartikel <i>um-</i> . . . . .                        | 414 |
| 5.3.1.14 | Verbpartikel <i>unter-</i> . . . . .                     | 414 |
| 5.3.1.15 | Verbpartikel <i>vor-</i> . . . . .                       | 414 |
| 5.3.1.16 | Verbpartikel <i>wider-</i> . . . . .                     | 416 |
| 5.3.1.17 | Verbpartikel <i>zu-</i> . . . . .                        | 416 |
| 5.3.1.18 | Verbpartikel <i>zwischen-</i> . . . . .                  | 417 |
| 5.3.2    | Adverbiale Verbpartikeln . . . . .                       | 419 |
| 5.3.2.1  | Grundsätzliches . . . . .                                | 419 |
| 5.3.2.2  | Direktionale Verbpartikeln . . . . .                     | 419 |
| 5.3.2.3  | Nichtdirektionale Verbpartikeln . . . . .                | 423 |
| 5.3.3    | Adjektivische Verbpartikeln . . . . .                    | 424 |
| 5.3.4    | Substantivische Verbpartikeln . . . . .                  | 427 |
| 5.4      | Suffix- und Zirkumfixderivation . . . . .                | 428 |
| 5.4.1    | Grundsätzliches . . . . .                                | 428 |
| 5.4.2    | Suffix <i>-el(n)/-l(n)</i> . . . . .                     | 429 |
| 5.4.3    | Suffix <i>-er(n)/-r(n)</i> . . . . .                     | 430 |
| 5.4.4    | Suffix <i>-ig(en)</i> . . . . .                          | 431 |
| 5.4.5    | Suffix <i>-ier(en)/-isier(en)/-ifizier(en)</i> . . . . . | 431 |
| 5.4.6    | Zirkumfixe . . . . .                                     | 433 |
| 5.5      | Konversion . . . . .                                     | 434 |
| 5.5.1    | Grundsätzliches . . . . .                                | 434 |
| 5.5.2    | Substantivische Basis . . . . .                          | 434 |
| 5.5.3    | Adjektivische Basis . . . . .                            | 437 |
| 5.5.4    | Andere Basen . . . . .                                   | 438 |
| 5.6      | Rückbildung . . . . .                                    | 439 |
| 5.7      | Komposition . . . . .                                    | 440 |

**XX Inhaltsverzeichnis**

Literaturverzeichnis . . . . . 443

Formenregister . . . . . 475

Sachregister . . . . . 478

Verzeichnis der Übersichten . . . . . 483
